# Supplementary material for: Differentiation of Tracheary Elements in Sugarcane Suspension Cells Involves Changes in Secondary Wall Deposition and Extensive Transcriptional Reprogramming
Source: Front Plant Sci. 2020 Dec 18;11:617020. doi: 10.3389/fpls.2020.617020 (PMC7814504; doi:10.3389/fpls.2020.617020)
Supplement: Supplementary file 13 [file Table_4.XLSX]

## Sheet: Sheet1
Table S4. Number of raw and trimmed reads and percentage of mapped reads against sugarcane reference genome.
Sample	Time	Replicate	Number of Raw reads	Number of Trimmed reads	% of trimmed reads (from the total of raw reads)	% of mapped reads (from the total of trimeed reads)
Control	0h	R1	31950518	31556371	98.77	77.47
		R2	27055298	26734645	98.81	79.23
		R3	23305706	22882318	98.18	79.61
	12h	R1	24034067	23654027	98.42	81.7
		R2	23358774	23057045	98.71	82.47
		R3	19518705	19252774	98.64	82.61
	48h	R1	21908544	21600042	98.59	83.04
		R2	25223933	24896792	98.7	81.86
		R3	19047130	18758587	98.49	82.71
	1w	R1	19471761	19241583	98.82	82.29
		R2	17768559	17502683	98.5	78.92
		R3	19739870	19482893	98.7	81.68
Induced	12h	R1	16692869	16442697	98.5	80.58
		R2	16473127	16213274	98.42	79.28
		R3	14293274	14063968	98.4	82.87
	48h	R1	15030952	14794831	98.43	81.67
		R2	16313734	16096784	98.67	82.51
		R3	14209877	14025314	98.7	78.8
	1w	R1	16214233	15978413	98.55	82
		R2	17686581	17441611	98.61	80.69
		R3	17535842	17214557	98.17	80.11
Total			416833354	410891209	98.57	80.95
